# Supplementary material
Source: publisher figshare collection journal article supplement (https://springernature.figshare.com/ndownloader/files/14505938)
Supplement: Supplementary file [file 14505938]

### **Assessments for Frailty in Nursing Homes**

Which structured assessments for frailty are used? *Please select as many options that apply. If partial assessments are being used, please specify this under 'Other'.*

- ☐ Central London Community Hospitals (CLCH) Multifactorial Falls Assessment
- ☐ Timed Up and Go
- ☐ 30 Second Sit to Stand
- ☐ Falls Efficacy Scale International (FES)
- ☐ Falls Efficacy Scale International (Short Form FES)
- ☐ BERG Balance Scale
- ☐ Short Form BERG Balance Scale (7-Item version)
- ☐ Balance Assessment (Tinetti Performance Oriented Assessment of Mobility)
- ☐ Gait Assessment (Tinetti Performance Oriented Assessment of Mobility)
- ☐ The Home Falls and Accidents Screening Tool (HOME FAST)
- ☐ Cohen-Mansfield Agitation Inventory
- ☐ Montreal Cognitive Assessment / MoCA-BLIND
- ☐ Screening Tool for Older Peoples' Inappropriate Treatment (STOPIT) review
- ☐ West London Mental Health NHS Trust Occupational Therapy (WLMHT O.T.) Functional Assessment
- ☐ Addenbrooke's Cognitive Examination (ACE-R)
- ☐ Mood / Depression Assessment Questionnaire
- ☐ Beck Depression Inventory
- ☐ Neuropsychiatric Inventory
- ☐ Mini Mental State Examination (MMSE)
- ☐ Hospital Anxiety and Depression Scale
- ☐ Electronic Frailty Index (eFI)
- ☐ Assessment of Motor and Process Skills (AMPS)
- ☐ Barthel Index of Activities of Daily Living
- ☐ Other (Please fill in the blank) (Text-Entry Box)
- ☐ Other (Please fill in the blank) (Text-Entry Box)
- ☐ Other (Please fill in the blank) (Text-Entry Box)
- ☐ No assessments for frailty are used

*(For each option reported to be in use, the following questions were asked. 'Assessment Example' has been used to represent an option reported to be in use)*

Which health professionals are using the 'Assessment Example'? *Please list as many that apply.*

- ☐ Doctor (Please specify type) (Text-Entry Box)
- ☐ Nurse (Please specify type) (Text-Entry Box)
- ☐ Physiotherapist
- ☐ Dietician
- ☐ Occupational Therapist
- ☐ Nurse Assistant
- ☐ Admin/Support Employees
- ☐ Other (Please specify) (Text-Entry Box)

Why is the 'Assessment Example' being used? *For example: in clinical decision making / resource allocation / end of life planning either by a single profession or as part of a wider MDT group or colleagues.*

(Text-Entry Box)

How are the responses to the 'Assessment Example' stored? *Please select only one option.*

- ☐ Paper
- ☐ Electronically (if so, what database?) (Text-Entry Box)
- ☐ Other (please specify) (Text-Entry Box)
- ☐ Don't Know

We would appreciate it if you could upload a copy of the assessments for frailty you mentioned. Please could you state whether this is possible.

- ☐ Yes - Assessments will be uploaded here
- ☐ No - Assessments cannot be uploaded here, but a site visit can be arranged to view assessments used
- ☐ No - Assessments cannot be uploaded here and a site visit cannot be arranged
